# Supplementary material for: Trigger Videos: A Novel Application of A Tool For Surgical Faculty Development
Source: Research Square preprint supplement (doi:10.21203/rs.3.rs-415372/v1), 2021-04-26
Supplement: Supplementary file 1 [file f8d95128fbff9fe3093c0919.docx]

**Appendix 1.** Trigger video YouTube® links

| **Video name** | **Link** |
| --- | --- |
| Open gastrectomy | https://www.youtube.com/watch?v=825ldhM7fUk&t=11s |
| Retroperitoneal node dissection | https://www.youtube.com/watch?v=Lc5PD_5if_s&t=25s |
| Right hemicolectomy | https://www.youtube.com/watch?v=6kytI3ETBHs&t=1s |
| Laparoscopic cholecystectomy | https://www.youtube.com/watch?v=bGv-Q-XWTIw&t=7s |
| Ankle ORIF | https://www.youtube.com/watch?v=NLzAGjrjK1o&t=8s |
